# Supplementary material for: HCG/GnRHa support improves outcomes after GnRH antagonist dual trigger and the predictive role of mid-luteal estradiol ratio: a case control study
Source: Research Square preprint supplement (doi:10.21203/rs.3.rs-8142666/v1), 2025-12-03
Supplement: Supplementary file 1 [file d64c04cf9b6d892323030a94.docx]

**Supplemental Table 1. Baseline characteristics of patients before propensity score matching (PSM) between support and non-support groups.**

|  | **ST (n=1459)** | **RT (n=736)** | **P-value** |
| --- | --- | --- | --- |
| Age (years, mean ± SD) | 32.31 ± 4.17 | 32.11 ± 4.47 | 0.3063 |
| BMI (kg/m2, mean ± SD) | 22.08 ± 3.07 | 21.87 ± 2.83 | 0.1099 |
| Infertility duration (years, mean ± SD) | 3.09 ± 2.70 | 3.21 ± 2.54 | 0.3327 |
| AMH (ng/ml, mean ± SD) | 3.04 ± 2.02 | 3.36 ± 2.45 | 0.0026 |
| AFC (n, mean ± SD) | 9.99 ± 4.31 | 10.40 ± 4.84 | 0.0516 |
| bFSH (IU/L, mean ± SD) | 8.25 ± 3.22 | 8.38 ± 2.69 | 0.3118 |
| TSH (mU/L, mean ± SD) | 2.74 ± 3.59 | 2.57 ± 1.51 | 0.1119 |
| CA125 (U/ml, mean ± SD) | 16.40 ± 19.66 | 15.48 ± 12.96 | 0.1955 |
| hCG E2 (pg/ml, mean ± SD) | 2086.54 ± 1070.15 | 2350.85 ± 1141.25 | 0.0000 |
| hCG P (ng/ml, mean ± SD) | 0.70 ± 0.25 | 0.77 ± 0.28 | 0.0000 |
| Gn initial (IU/L, mean ± SD) | 258.46 ± 45.93 | 247.52 ± 48.02 | 0.0000 |
| Gn duration (days, mean ± SD) | 9.25 ± 1.36 | 9.32 ± 1.38 | 0.2867 |
| Total Gn dosage (IU/L, mean ± SD) | 2349.30 ± 646.38 | 2259.27 ± 658.18 | 0.0024 |
| Retrieved oocytes (n, mean ± SD) | 8.53 ± 4.12 | 9.35 ± 4.27 | 0.0000 |
| MII oocytes (n, mean ± SD) | 6.81 ± 3.62 | 7.47 ± 3.70 | 0.0001 |
| 2PN (n, mean ± SD) | 5.02 ± 2.96 | 5.57 ± 3.06 | 0.0001 |
| Avaliable embryos (n, mean ± SD) | 4.51 ± 2.74 | 4.89 ± 2.83 | 0.0028 |
| ET embryos (n, mean ± SD) | 1.52 ± 0.50 | 1.49 ± 0.50 | 0.1359 |
| ET EM (mm, mean ± SD) | 5.29 ± 1.04 | 5.38 ± 1.12 | 0.0608 |

Values are presented as mean ± standard deviation (SD) for continuous variables and number (percentage) for categorical variables. P-values are calculated using the independent t-test for continuous variables and the chi-square test for categorical variables. *Statistically significant difference at P < 0.05.*

**Supplemental Table 2. Baseline characteristics of patients after propensity score matching (PSM) between support and non-support groups.**

|  | **ST (n=1331)** | **RT (n=1331)** | **P-value** |
| --- | --- | --- | --- |
| Age (years, mean ± SD) | 32.30 ± 4.15 | 32.32 ± 4.54 | 0.9219 |
| BMI (kg/m2, mean ± SD) | 22.08 ± 3.08 | 22.23 ± 2.95 | 0.1903 |
| Infertility duration (years, mean ± SD) | 3.08 ± 2.68 | 3.22 ± 2.57 | 0.1607 |
| AMH (ng/ml, mean ± SD) | 3.01 ± 1.98 | 3.11 ± 2.36 | 0.2317 |
| AFC (n, mean ± SD) | 9.89 ± 4.19 | 10.05 ± 4.74 | 0.3491 |
| bFSH (IU/L, mean ± SD) | 8.28 ± 3.20 | 8.47 ± 2.83 | 0.1013 |
| TSH (mU/L, mean ± SD) | 2.75 ± 3.71 | 2.75 ± 1.87 | 0.9932 |
| CA125 (U/ml, mean ± SD) | 16.30 ± 19.70 | 15.82 ± 13.06 | 0.4589 |
| hCG E2 (pg/ml, mean ± SD) | 2078.93 ± 1060.46 | 2070.47 ± 1036.20 | 0.8351 |
| hCG P (ng/ml, mean ± SD) | 0.70 ± 0.24 | 0.70 ± 0.25 | 0.7084 |
| Gn initial (IU/L, mean ± SD) | 259.52 ± 45.74 | 259.43 ± 46.30 | 0.9580 |
| Gn duration (days, mean ± SD) | 9.27 ± 1.36 | 9.36 ± 1.60 | 0.1246 |
| Total Gn dosage (IU/L, mean ± SD) | 2365.51 ± 647.60 | 2397.29 ± 770.76 | 0.2495 |
| Retrieved oocytes (n, mean ± SD) | 8.44 ± 4.05 | 8.43 ± 4.19 | 0.9250 |
| MII oocytes (n, mean ± SD) | 6.73 ± 3.54 | 6.82 ± 3.60 | 0.5114 |
| 2PN (n, mean ± SD) | 4.93 ± 2.89 | 5.01 ± 2.90 | 0.4500 |
| Avaliable embryos (n, mean ± SD) | 4.44 ± 2.67 | 4.42 ± 2.66 | 0.8958 |
| ET embryos (n, mean ± SD) | 1.52 ± 0.50 | 1.50 ± 0.50 | 0.2295 |
| ET EM (mm, mean ± SD) | 5.30 ± 1.05 | 5.22 ± 1.14 | 0.0825 |

Values are presented as mean ± standard deviation (SD) for continuous variables and number (percentage) for categorical variables. P-values are calculated using the independent t-test for continuous variables and the chi-square test for categorical variables. *Statistically significant difference at P < 0.05.*

**Supplemental Table 3. Neonatal Birth Outcomes Before and After Propensity Score Matching (PSM).**

|  | **ST** | **RT** | **P-value** | **ST** | **RT** | **P-value** |
| --- | --- | --- | --- | --- | --- | --- |
| Singleton Before PSM | |  | Singleton After PSM | |  |
| Birth Weight (g, Mean±SD) | 3094.9 ± 512.4 | 3160.2 ± 469.9 | <0.05 | 3091.0 ± 492.5 | 3163.4 ± 498.2 | 0.11319 |
| Birth Height (cm, Mean±SD) | 48.9 ± 2.7 | 49.3 ± 1.9 | 0.14958 | 48.9 ± 2.4 | 49.2 ± 2.1 | 0.18623 |
| Birth Defects | 1/235 (0.4%) | 0/148 (0%) | 1 | 1/216 (0.46%) | 0/217 (0%) | 0.49885 |
| Complications | 20/244 (8.2%) | 6/151 (4%) | 0.14259 | 20/225 (8.9%) | 6/227 (2.6%) | <0.05 |
|  | Twins Before PSM | |  | Twins After PSM | |  |
| Birth Weight (g, Mean±SD) | 4511.6 ± 771.5 | 4614.2 ± 963.3 | 0.84425 | 4559.0 ± 742.9 | 4866.4 ± 806.8 | 0.0746 |
| Birth Height (cm, Mean±SD) | 90.3 ± 7.4 | 91.2 ± 7.3 | 0.17793 | 90.5 ± 7.2 | 92.7 ± 4.7 | 0.24671 |
| Birth Defects | 0/30 (0%) | 0/33 (0%) | 1 | 0/28 (0%) | 0/81 (0%) | 1 |
| Complications | 4/30 (13.3%) | 3/33 (9%) | 0.69972 | 3/28 (10.7%) | 5/81 (6.2%) | 0.42081 |

ST = strengthened luteal phase support, RT = routine luteal phase support, PSM = propensity score matching, CI = confidence interval, OR = odds ratio.

**Supplemental Table 4. Multivariate Logistic Regression Analysis for Pregnancy Outcomes.**

| **Variable** | **OR** | **CI lower** | **CI upper** | **P** | **OR** | **CI lower** | **CI upper** | **P** | **OR** | **CI lower** | **CI upper** | **P** |
| --- | --- | --- | --- | --- | --- | --- | --- | --- | --- | --- | --- | --- |
|  | Chemical pregnancy | | | | Clinical pregnancy | | | | Live birth | | | |
| ST | 1.75 | 1.49 | 2.05 | 0.00 | 1.59 | 1.36 | 1.87 | 0.00 | 1.48 | 1.26 | 1.74 | 0.00 |
| AMH | 1.06 | 1.00 | 1.11 | 0.03 | 1.05 | 1.00 | 1.10 | 0.06 | 1.05 | 0.99 | 1.10 | 0.08 |
| bFSH | 0.97 | 0.95 | 1.00 | 0.07 | 0.99 | 0.96 | 1.02 | 0.44 | 1.00 | 0.97 | 1.02 | 0.73 |
| AFC | 0.97 | 0.95 | 1.00 | 0.03 | 0.99 | 0.97 | 1.02 | 0.45 | 1.00 | 0.97 | 1.02 | 0.89 |
| HCG-E2 | 1.00 | 1.00 | 1.00 | 0.01 | 1.00 | 1.00 | 1.00 | 0.00 | 1.00 | 1.00 | 1.00 | 0.00 |
| HCG-P | 0.60 | 0.42 | 0.87 | 0.01 | 0.64 | 0.44 | 0.92 | 0.02 | 0.58 | 0.40 | 0.84 | 0.00 |
| age | 0.93 | 0.92 | 0.95 | 0.00 | 0.93 | 0.91 | 0.95 | 0.00 | 0.92 | 0.90 | 0.94 | 0.00 |
| BMI | 1.03 | 1.00 | 1.06 | 0.06 | 1.02 | 0.99 | 1.05 | 0.13 | 1.02 | 1.00 | 1.05 | 0.09 |
| ET-EM | 1.17 | 1.08 | 1.26 | 0.00 | 1.15 | 1.06 | 1.24 | 0.00 | 1.14 | 1.06 | 1.23 | 0.00 |
| ET-high-quality-embryos | 1.59 | 1.42 | 1.79 | 0.00 | 1.52 | 1.35 | 1.70 | 0.00 | 1.51 | 1.34 | 1.70 | 0.00 |

ST = strengthened luteal phase support, CI = confidence interval, OR = odds ratio.

**Supplemental Table 5. Subgroup Analysis of Pregnancy Outcomes by Age and AMH.**

| **Subgroup** | **OR** | **CI lower** | **CI upper** | **P** | **OR** | **CI lower** | **CI upper** | **P** | **OR** | **CI lower** | **CI upper** | **P** |
| --- | --- | --- | --- | --- | --- | --- | --- | --- | --- | --- | --- | --- |
|  | Chemical pregnancy | | | | Clinical pregnancy | | | | Live birth | | | |
| Age <35 | 1.72 | 1.43 | 2.06 | 0.00 | 1.50 | 1.25 | 1.79 | 0.00 | 1.48 | 1.24 | 1.78 | 0.00 |
| Age ≥35 | 1.74 | 1.29 | 2.34 | 0.00 | 1.83 | 1.33 | 2.50 | 0.00 | 1.38 | 0.99 | 1.91 | 0.06 |
| AMH ≥1.2 | 1.66 | 1.41 | 1.96 | 0.00 | 1.53 | 1.30 | 1.81 | 0.00 | 1.46 | 1.23 | 1.72 | 0.00 |
| AMH <1.2 | 2.20 | 1.45 | 3.35 | 0.00 | 1.89 | 1.23 | 2.88 | 0.00 | 1.49 | 0.96 | 2.29 | 0.07 |
| High Quality Embryos = 0 | 1.97 | 1.45 | 2.67 | 0.00 | 1.73 | 1.27 | 2.35 | 0.00 | 1.73 | 1.26 | 2.38 | 0.00 |
| High Quality Embryos = 1 | 1.43 | 1.15 | 1.76 | 0.00 | 1.41 | 1.14 | 1.75 | 0.00 | 1.30 | 1.04 | 1.61 | 0.02 |
| High Quality Embryos = 2 | 2.52 | 1.78 | 3.58 | 0.00 | 1.85 | 1.31 | 2.60 | 0.00 | 1.62 | 1.15 | 2.28 | 0.01 |
| ET-EM <3.5 | 0.57 | 0.19 | 1.71 | 0.32 | 0.47 | 0.15 | 1.45 | 0.19 | 0.47 | 0.15 | 1.45 | 0.19 |
| ET-EM ≥3.5 | 1.76 | 1.51 | 2.06 | 0.00 | 1.61 | 1.38 | 1.89 | 0.00 | 1.49 | 1.28 | 1.75 | 0.00 |
| HCG-P <1.2 | 1.73 | 1.48 | 2.02 | 0.00 | 1.58 | 1.35 | 1.85 | 0.00 | 1.46 | 1.24 | 1.71 | 0.00 |
| HCG-P ≥1.2 | 1.64 | 0.67 | 4.04 | 0.28 | 1.46 | 0.58 | 3.65 | 0.42 | 1.65 | 0.62 | 4.38 | 0.31 |

AMH = anti-Müllerian hormone, ET-EM = endometrial thickness in embryo transfer day, hCG-E2 = estradiol levels on hCG day, hCG-P = progesterone levels on hCG day, hCG = human chorionic gonadotropin; CI = confidence interval, OR = odds ratio.

**Supplemental Table 6. Association Between E2 Ratio and Clinical Pregnancy: Adjusted Odds Ratios.**

| **E2_ratio** | **Adjusted_OR** | **CI_lower** | **CI_upper** | **P_value** |
| --- | --- | --- | --- | --- |
| 0.05 | 6.21 | 2.86 | 13.52 | 0.0000 |
| 0.1 | 2.83 | 1.22 | 6.57 | 0.0151 |
| 0.15 | 2.07 | 0.74 | 5.81 | 0.1675 |
| 0.2 | 0.90 | 0.32 | 2.55 | 0.8449 |
| 0.25 | 1.08 | 0.30 | 3.84 | 0.9054 |
| 0.3 | 0.81 | 0.19 | 3.41 | 0.7707 |
| 0.35 | 1.09 | 0.26 | 4.57 | 0.9079 |
| 0.4 | 0.44 | 0.09 | 2.22 | 0.3203 |
| 0.45 | 0.24 | 0.05 | 1.17 | 0.0782 |
| 0.5 | 0.58 | 0.15 | 2.28 | 0.4357 |
| 0.55 | 0.38 | 0.09 | 1.71 | 0.2088 |
| 0.7 | 1.42 | 0.19 | 10.48 | 0.7339 |

PSM = propensity score matching，CI = confidence interval, OR = odds ratio.

**Supplemental Table 7. Association Between E2 Ratio and Live Birth: Adjusted Odds Ratios.**

| **E2_ratio** | **Adjusted_OR** | **CI_lower** | **CI_upper** | **P_value** |
| --- | --- | --- | --- | --- |
| 0.05 | 4.57 | 2.10 | 9.95 | 0.0001 |
| 0.1 | 2.68 | 1.12 | 6.46 | 0.0275 |
| 0.15 | 5.52 | 1.47 | 20.80 | 0.0116 |
| 0.2 | 1.49 | 0.50 | 4.47 | 0.4724 |
| 0.25 | 0.94 | 0.26 | 3.45 | 0.9312 |
| 0.3 | 0.68 | 0.16 | 2.98 | 0.6136 |
| 0.35 | 1.38 | 0.33 | 5.81 | 0.6596 |
| 0.4 | 0.94 | 0.25 | 3.51 | 0.9311 |
| 0.45 | 0.28 | 0.07 | 1.15 | 0.0774 |
| 0.5 | 0.43 | 0.11 | 1.73 | 0.2346 |
| 0.55 | 0.31 | 0.07 | 1.40 | 0.1273 |
| 0.7 | 1.17 | 0.16 | 8.72 | 0.8811 |

PSM = propensity score matching，CI = confidence interval, OR = odds ratio.

**Supplemental figure 1. Comparison of neonatal outcomes and maternal complications in singleton pregnancies between the ST and RT groups before and after PSM.**

**
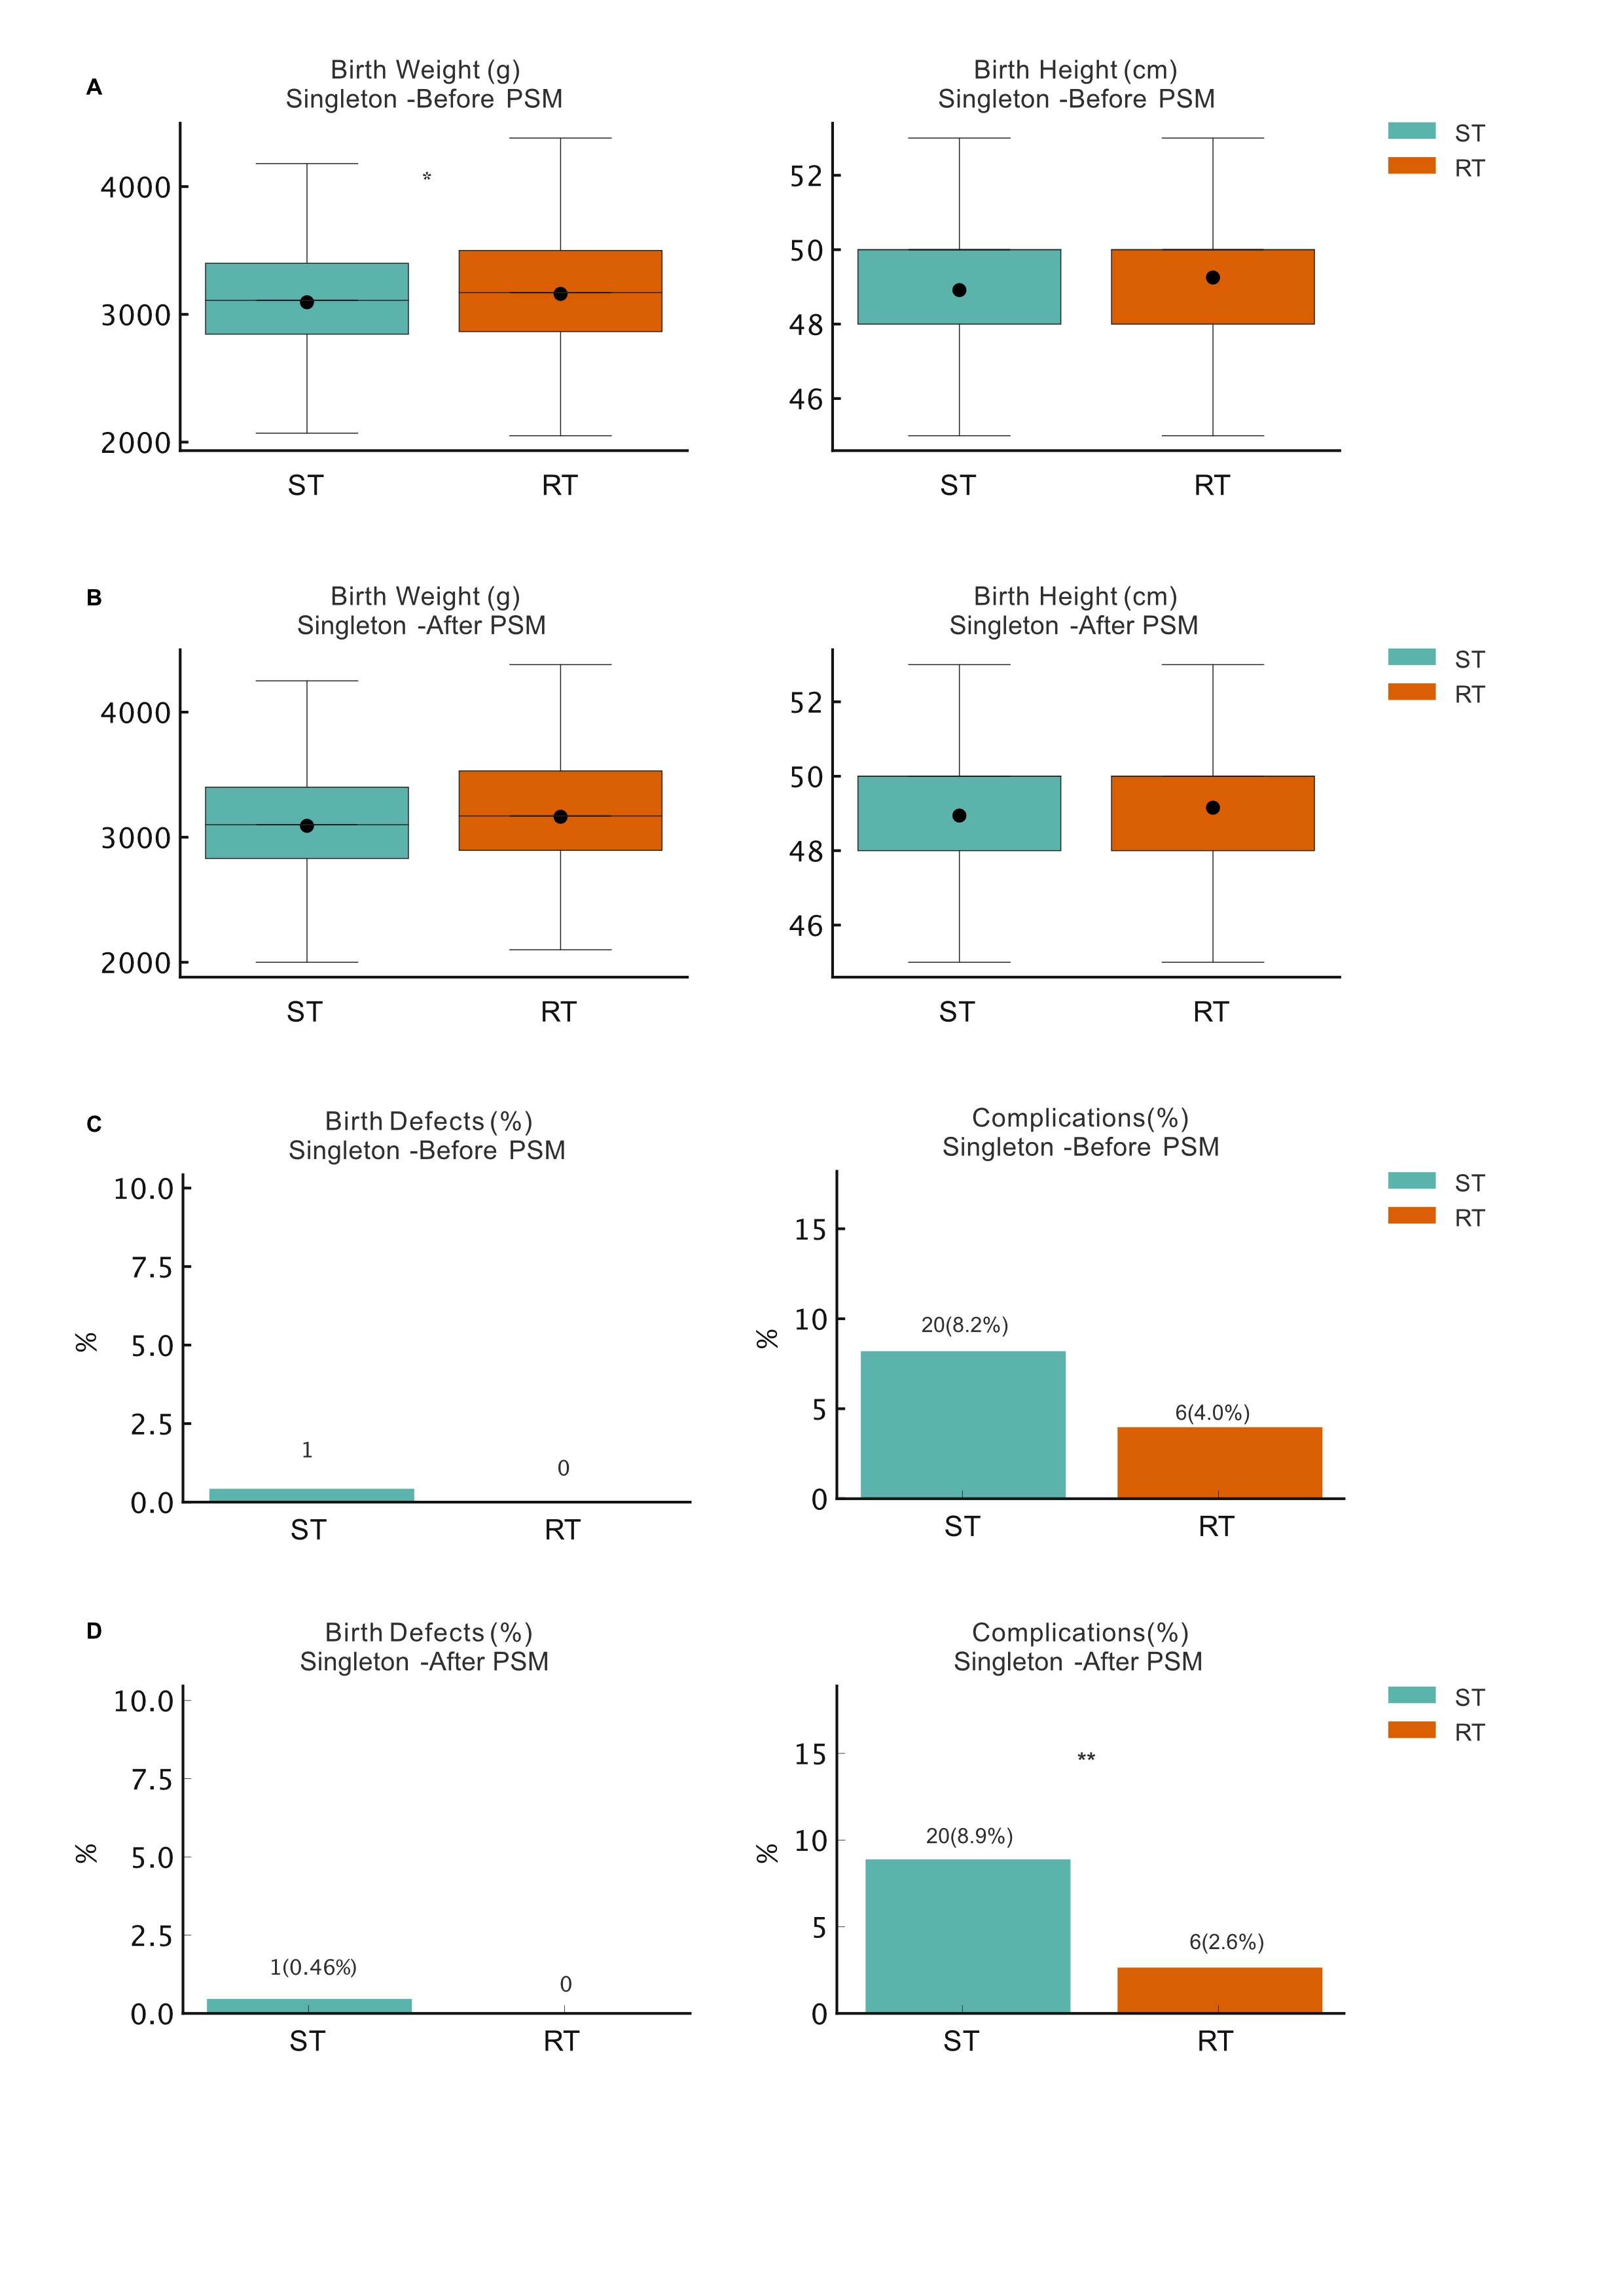
**

1. Neonatal outcomes including birth weight and birth height were compared between the two groups before PSM.
2. Neonatal outcomes including birth weight and birth height were compared between the two groups after PSM.
3. The incidence of birth defects and maternal complications were compared between the two groups before PSM.
4. The incidence of birth defects and maternal complications were compared between the two groups after PSM.

Black dots within box plots represent the mean value. Asterisks denote statistical significance (*p < 0.05, **p < 0.01). ST = Strengthened luteal phase support; RT = Routine luteal phase support; PSM = propensity score matching.

**Supplemental figure 2. Comparison of neonatal outcomes and maternal complications in twin pregnancies between the ST and RT groups before and after PSM.**

**
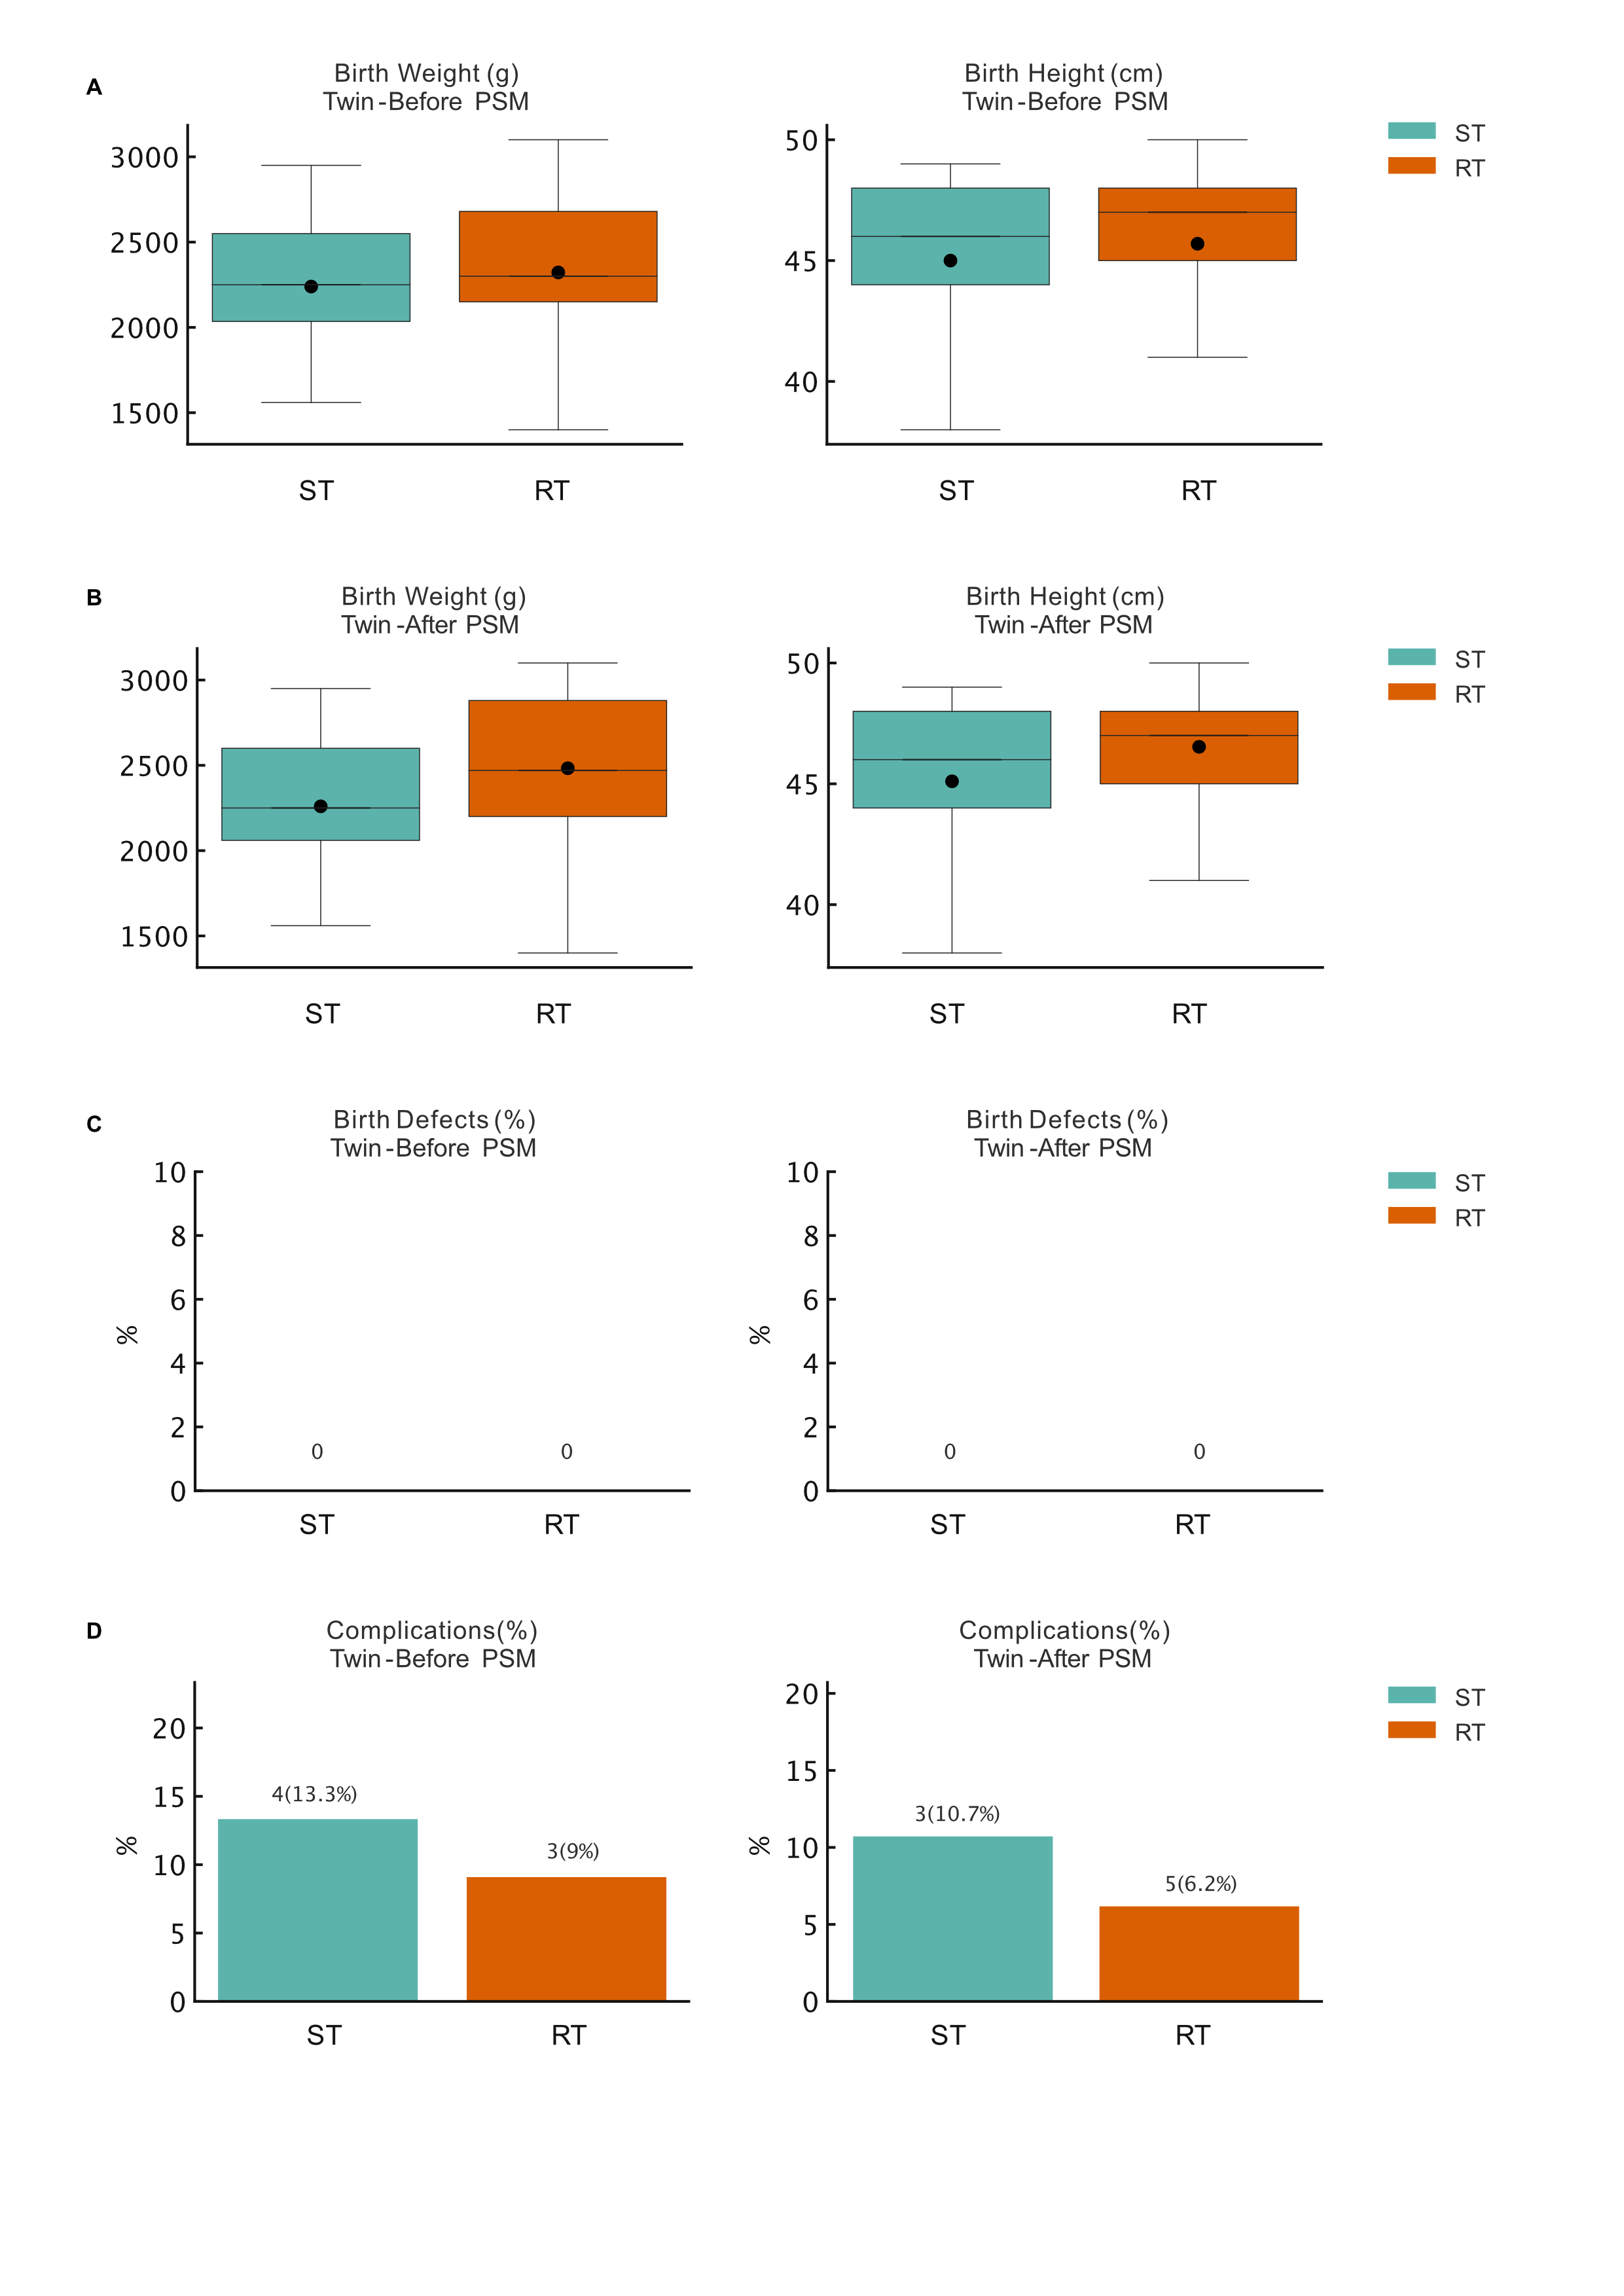
**

1. Neonatal outcomes, including birth weight and height, showed no statistically significant differences between the two groups before PSM.
2. The incidences of birth defects and maternal complications were compared between the groups across after PSM.
3. The incidences of birth defects and maternal complications were compared between the groups across before PSM.
4. The incidences of birth defects and maternal complications were compared between the groups across after PSM.

Black dots within box plots represent the mean value. ST = Strengthened luteal phase support; RT = Routine luteal phase support; PSM = propensity score matching.

**Figure S3. Multivariate logistic regression analysis of predictors of pregnancy outcomes.**

**
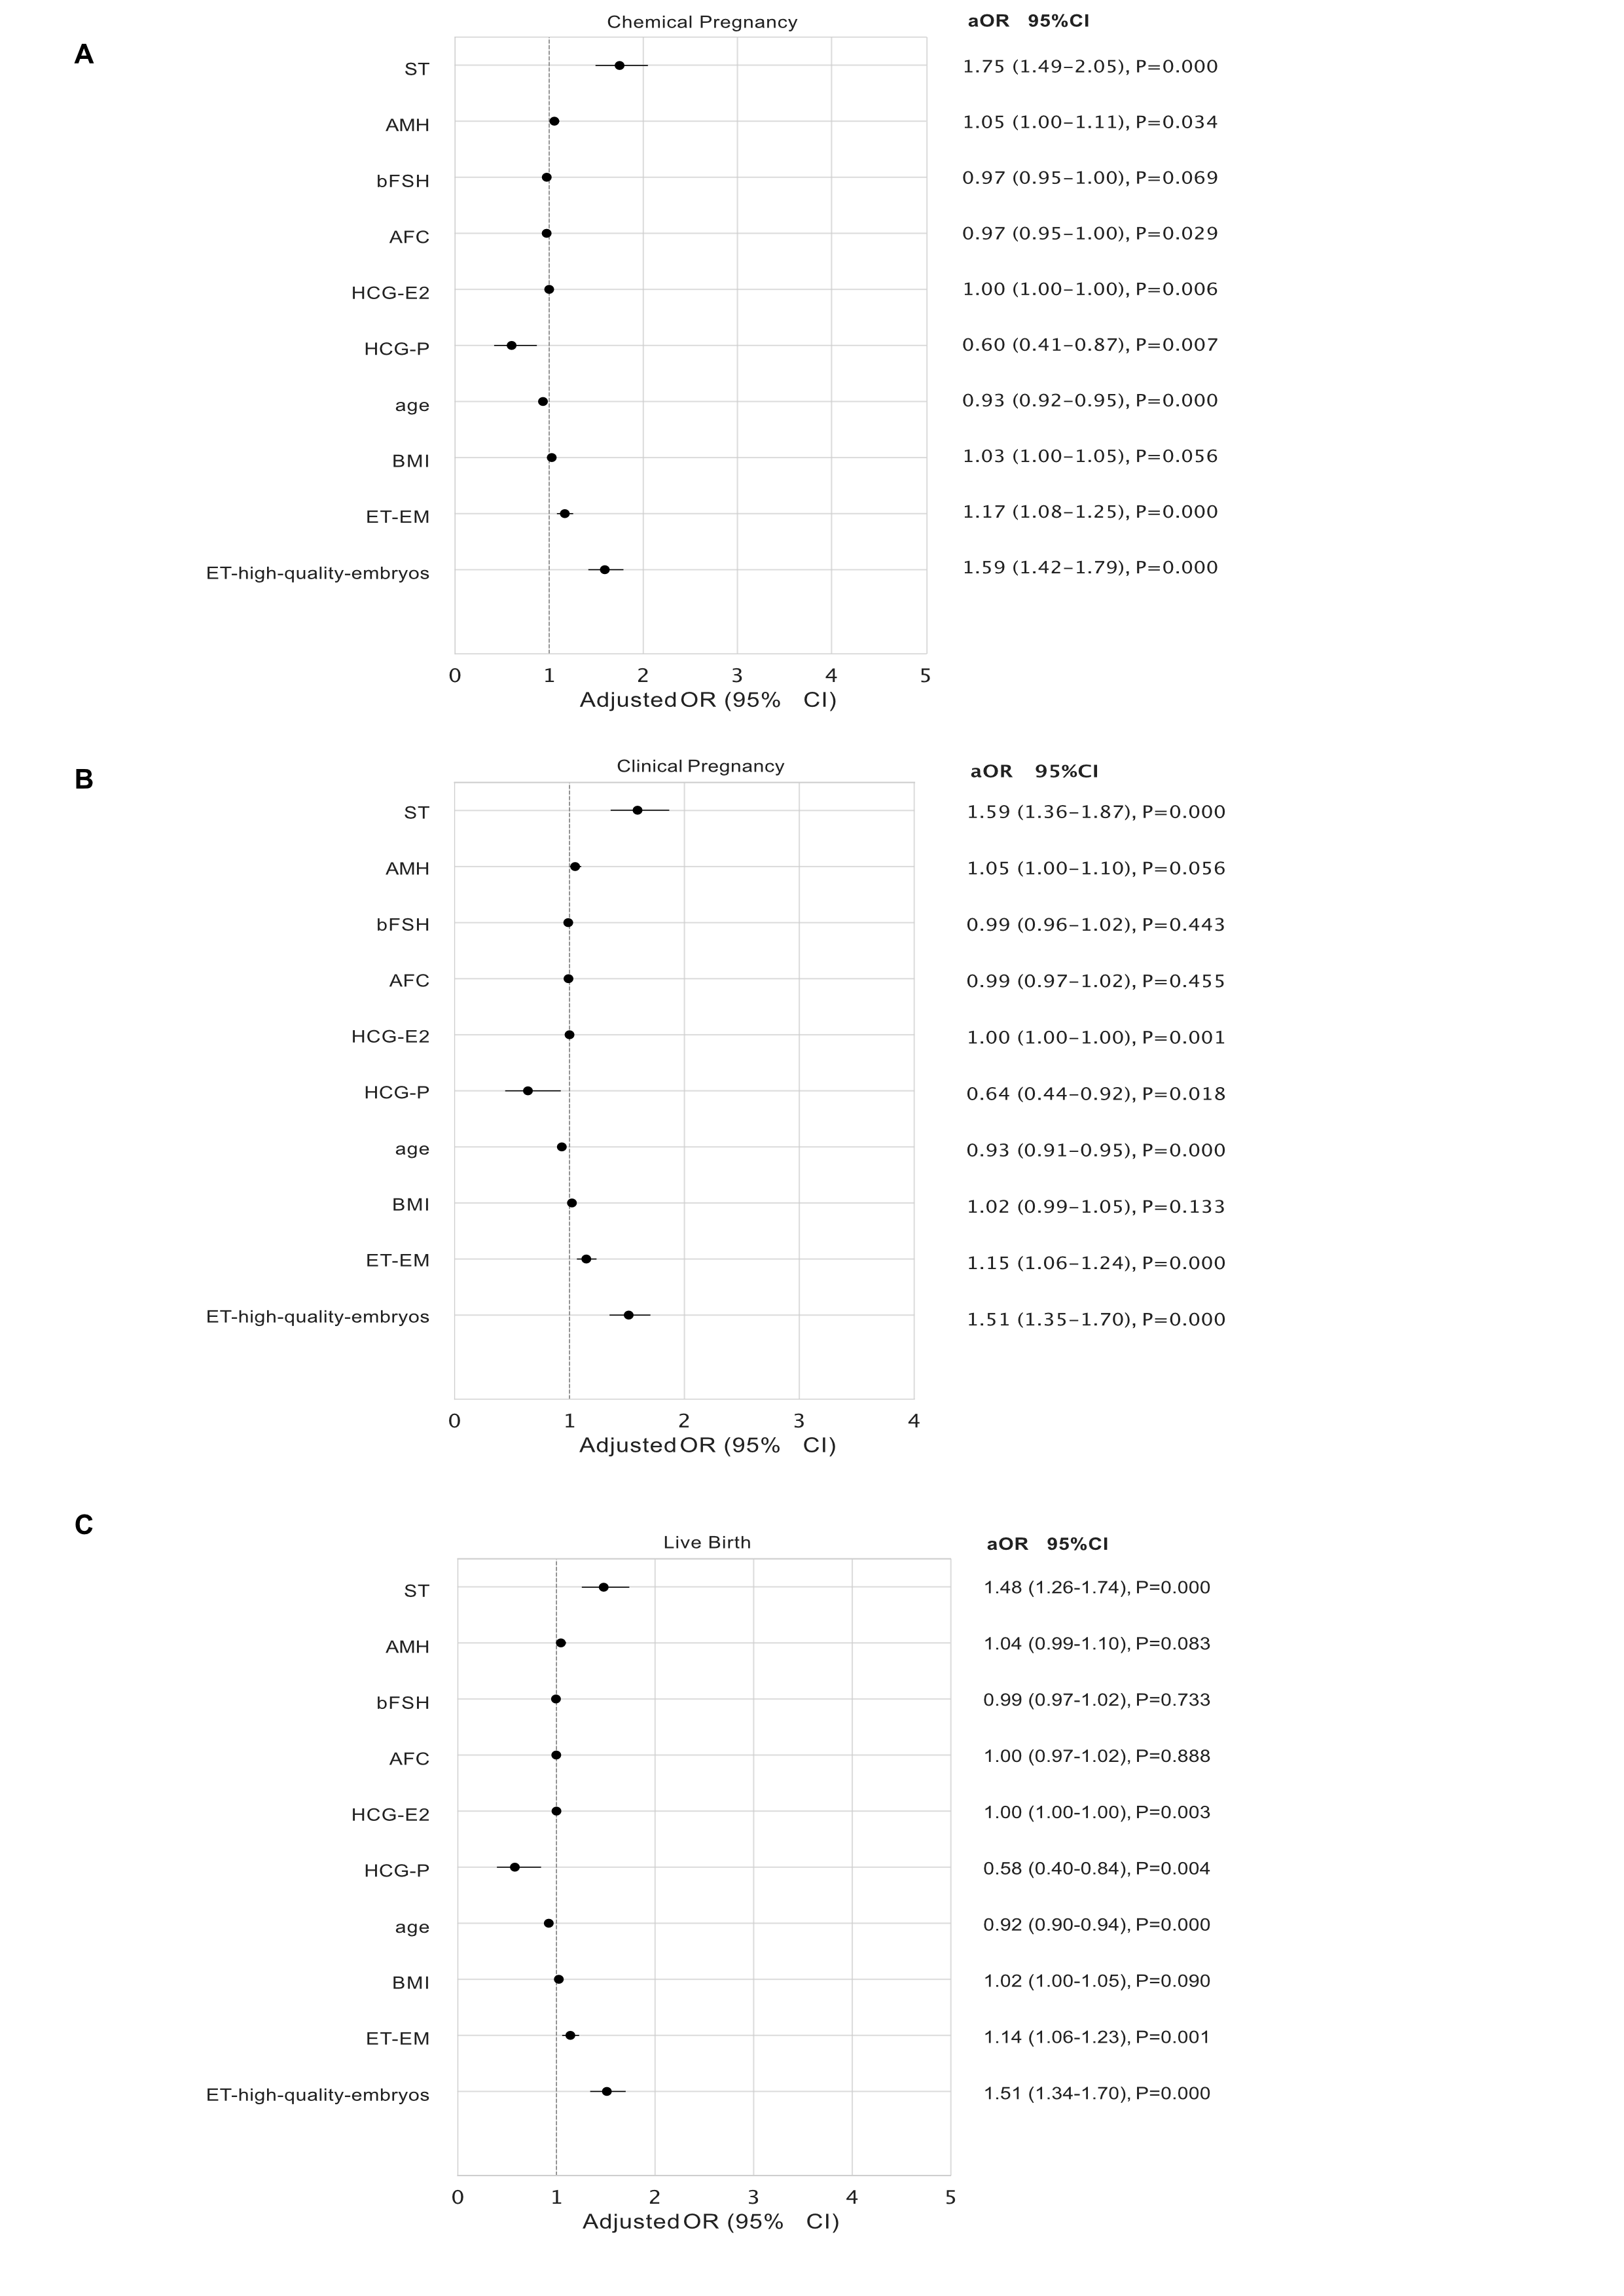
**

(A) aORs and 95% CIs for clinical pregnancy.

(B) aORs and 95% CIs for chemical pregnancy.

(C) aORs and 95% CIs for live birth.

Forest plots display the associations between selected clinical and treatment-related variables and pregnancy outcomes, based on multivariate logistic regression models.

AMH = anti-Müllerian hormone, BMI = body mass index, ET EM = endometrial thickness in embryo transfer day, hCG E2 = estradiol levels on hCG day, hCG P = progesterone levels on hCG day, hCG = human chorionic gonadotropin, CI = confidence interval, aOR = adjusted odds ratio.
